# Supplementary material for: The Different Effects of Direct Bilirubin on Portopulmonary Hypertension and Idiopathic Pulmonary Arterial Hypertension
Source: Hindawi journal article supplement (doi:10.1155/2022/7021178), 2022-01-01

A

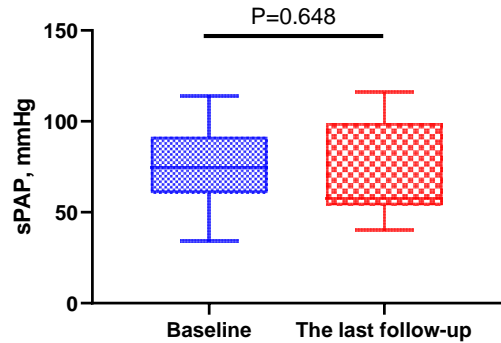

B

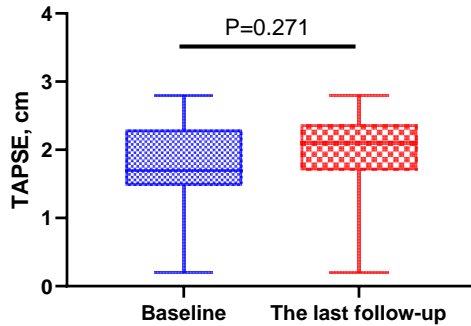

C

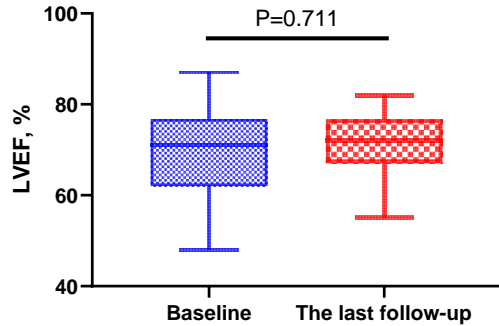

Supplement: f1 [file 7021178.f1.pdf]
